# Supplementary material for: Ovarian development, spawning season, size at maturity and fecundity of Acentrogobius viridipunctatus (Valenciennes, 1837) in the Vietnamese Mekong Delta
Source: PeerJ. 2022 Sep 22;10:e14077. doi: 10.7717/peerj.14077 (PMC9509675; doi:10.7717/peerj.14077)
Supplement: Supplemental Information 1 [file peerj-10-14077-s001.xlsx]

## Sheet: Sheet1
No.	Stage	W	TL	WG	GSI	Month	Site (1: LHTV; 2: TBST; 3: DHBL; 4: TTCM	Season (1: dry season; 2: wet season)
1	4	13.63	10.1	0.4752	3.48643	1	1	1
2	4	5.89	7.5	0.6038	10.2513	1	1	1
3	4	7.05	8.8	0.4036	5.72482	1	1	1
4	4	5.04	7.7	0.303	6.0119	1	1	1
5	3	4.59	7.3	0.1107	2.41176	1	1	1
6	3	5.7	7.7	0.1253	2.19825	2	1	1
7	3	5.9	7.9	0.1485	2.51695	2	1	1
8	3	5.7	7.7	0.1253	2.19825	2	1	1
9	2	7	8.1	0.0456	0.651429	2	1	1
10	2	5	7.3	0.0532	1.064	2	1	1
11	2	4.86	7.2	0.0425	0.874486	2	1	1
12	1	7	8.2	0.0124	0.177143	2	1	1
13	1	6.58	7.9	0.0124	0.18845	2	1	1
14	1	6.39	7.9	0.0136	0.212833	2	1	1
15	4	4.79	7.5	0.2124	4.43424	2	1	1
16	4	6.27	7.8	0.3947	6.29506	2	1	1
17	4	5.81	7.8	0.3475	5.98107	2	1	1
18	4	6.06	7.7	0.4636	7.65017	2	1	1
19	4	4.28	6.8	0.3011	7.03505	2	1	1
20	4	4.36	7	0.2978	6.83028	3	1	1
21	3	4.26	7.1	0.1809	4.24648	3	1	1
22	2	13.7	9.5	0.0465	0.339416	3	1	1
23	4	10.75	8.5	0.2268	2.10977	3	1	1
24	4	10.14	8.5	0.6847	6.75247	3	1	1
25	3	4.9	7	0.1542	3.14694	3	1	1
26	2	7.28	7.7	0.0632	0.868132	3	1	1
27	1	16.07	10.9	0.0666	0.414437	4	1	1
28	1	6.53	8.2	0.0825	1.2634	4	1	1
29	4	20.96	11.6	2.146	10.2385	4	1	1
30	3	10.14	10.1	0.1962	1.93491	4	1	1
31	3	12.68	10	0.1236	0.974763	4	1	1
32	2	8.86	8.8	0.0569	0.642212	4	1	1
33	3	17.76	11.4	0.1475	0.830518	4	1	1
34	4	22.64	12.2	1.0118	4.46908	4	1	1
35	4	23.13	11.8	2.8463	12.3057	4	1	1
36	4	16.36	10	2.0428	12.4866	4	1	1
37	4	16.29	10.6	1.4214	8.7256	4	1	1
38	4	15.41	10.8	0.9944	6.45295	4	1	1
39	4	9.87	9.1	0.9162	9.28267	4	1	1
40	4	11.47	9.7	0.7368	6.42371	4	1	1
41	4	9.84	9.8	0.7083	7.19817	4	1	1
42	4	11.95	9.1	2.0142	16.8552	4	1	1
43	1	8.64	9.4	0.0774	0.895833	4	1	1
44	3	11.5	9.4	0.1236	1.07478	4	1	1
45	3	17.17	10.8	0.2545	1.48224	5	1	1
46	4	11.92	9.6	1.36	11.4094	5	1	1
47	3	14.66	10.7	0.1784	1.21692	5	1	1
48	2	14.24	10.1	0.0583	0.40941	5	1	1
49	2	10.57	9.5	0.0953	0.901608	6	1	2
50	4	13.37	11.2	0.58	4.33807	6	1	2
51	5	16.09	10.6	2.0453	12.7116	6	1	2
52	4	11.56	9.6	1.2916	11.173	6	1	2
53	4	7.28	8.5	0.0719	0.987637	6	1	2
54	5	14.66	10.2	1.5412	10.513	6	1	2
55	4	14.82	9.6	0.6031	4.0695	6	1	2
56	4	9.21	8.8	1.2261	13.3127	6	1	2
57	4	11.06	9.4	0.3873	3.50181	6	1	2
58	4	13.97	10.4	0.8872	6.35075	6	1	2
59	4	10.25	9.6	0.7188	7.01268	6	1	2
60	3	11.23	9.8	0.2498	2.2244	6	1	2
61	4	11.16	9.8	0.7158	6.41398	7	1	2
62	4	10.01	9.5	0.6022	6.01598	7	1	2
63	1	16.33	11	0.1137	0.696265	7	1	2
64	1	9.4	8.5	0.0412	0.438298	7	1	2
65	3	13.41	10.6	0.182	1.3572	7	1	2
66	4	14.87	11	0.3557	2.39206	7	1	2
67	4	15.47	10.5	0.6631	4.28636	7	1	2
68	4	17.62	11.8	0.4125	2.34109	7	1	2
69	5	14.39	11.3	0.2365	1.6435	7	1	2
70	3	11.65	10.2	0.1914	1.64292	7	1	2
71	5	13.84	11	0.2368	1.71098	7	1	2
72	4	7.38	8.5	0.7223	9.78726	8	1	2
73	4	6.9	8	0.688	9.97101	8	1	2
74	4	7.36	8.7	0.5099	6.92799	8	1	2
75	5	11.65	10	1.3406	11.5073	8	1	2
76	4	5.28	7.9	0.4565	8.64583	8	1	2
77	4	19.23	11.5	0.6832	3.55278	8	1	2
78	2	15.34	10.5	0.0855	0.557366	8	1	2
79	2	16.57	11.5	0.0987	0.595655	8	1	2
80	4	8.03	8.9	0.744	9.26526	8	1	2
81	3	4.3	7	0.2513	5.84419	8	1	2
82	5	9.4	8.8	1.4166	15.0702	8	1	2
83	4	9.34	9.1	0.8413	9.00749	8	1	2
84	4	6.85	7.7	0.4541	6.6292	8	1	2
85	4	5.72	6.5	0.5598	9.78671	9	1	2
86	5	5.9	7.8	0.9783	16.5814	9	1	2
87	5	6.01	7.3	0.5663	9.42263	9	1	2
88	3	5.04	7.6	0.2486	4.93254	9	1	2
89	2	4.75	7.4	0.0334	0.703158	9	1	2
90	4	11.7	9	0.816	6.97436	9	1	2
91	4	8.56	8.2	0.262	3.06075	10	1	2
92	4	13.46	10	0.3613	2.68425	10	1	2
93	4	11.73	9.5	0.1702	1.45098	10	1	2
94	3	11.64	9.6	0.2052	1.76289	10	1	2
95	4	9.63	8.8	0.662	6.87435	10	1	2
96	3	9.66	8.9	0.1652	1.71014	10	1	2
97	3	10.06	9.1	0.1569	1.55964	10	1	2
98	4	14.83	10.5	0.2931	1.9764	11	1	2
99	3	11.76	9.6	0.1431	1.21684	11	1	2
100	3	10.62	9.3	0.1236	1.16384	11	1	2
101	3	9.69	9.1	0.1707	1.76161	11	1	2
102	4	8.75	8.4	1.3467	15.3909	11	1	2
103	4	9.6	9	1.61	16.7708	11	1	2
104	2	7.92	9	0.0437	0.551768	11	1	2
105	4	7.18	8.8	0.219	3.05014	12	1	2
106	3	4.19	7	0.0557	1.32936	12	1	2
107	1	5.28	7.8	0.0388	0.734848	12	1	2
108	2	5.3	7.7	0.0559	1.05472	12	1	2
109	2	4.65	7.5	0.0332	0.713978	12	1	2
110	1	5.42	7.6	0.0283	0.52214	1	2	1
111	3	14.48	9	0.1235	0.852901	1	2	1
112	4	9.76	8.4	0.2004	2.05328	1	2	1
113	4	12.12	9	0.4229	3.48927	1	2	1
114	4	5.24	6.6	0.5374	10.2557	1	2	1
115	4	14.14	10.7	0.5024	3.55304	1	2	1
116	4	6.11	7.9	0.6384	10.4484	2	2	1
117	4	13.63	10.1	0.4752	3.48643	2	2	1
118	4	5.89	7.5	0.6038	10.2513	2	2	1
119	4	12.85	9.5	0.4483	3.48872	2	2	1
120	4	5.56	7.1	0.5696	10.2446	2	2	1
121	4	13.09	9.9	0.461	3.52177	3	2	1
122	4	5.66	7.2	0.5857	10.3481	3	2	1
123	4	12.85	9.5	0.4483	3.48872	3	2	1
124	4	5.56	7.1	0.5696	10.2446	3	2	1
125	4	13.49	9.4	0.4073	3.01927	4	2	1
126	4	15.88	10.9	0.3891	2.45025	4	2	1
127	4	15.9	10.6	0.3116	1.95975	4	2	1
128	4	11.76	9	0.2863	2.43452	4	2	1
129	2	14.68	9.7	0.009	0.0613079	4	2	1
130	4	9.23	8.6	0.3572	3.86999	4	2	1
131	4	13.32	9.5	0.3015	2.26351	4	2	1
132	4	15.99	11.6	1.5482	9.6823	4	2	1
133	5	34.25	13.1	4.1186	12.0251	5	2	1
134	5	17.44	10.9	1.7858	10.2397	5	2	1
135	4	16.73	11.3	0.4669	2.79079	5	2	1
136	3	18.95	11.8	0.1925	1.01583	5	2	1
137	2	11.81	10.5	0.0413	0.349704	5	2	1
138	1	5.31	7.9	0.0197	0.370998	5	2	1
139	4	7.93	7.8	0.9568	12.0656	5	2	1
140	2	5.68	8	0.066	1.16197	5	2	1
141	3	3.85	7	0.073	1.8961	5	2	1
142	2	4.3	7	0.0137	0.318605	5	2	1
143	2	2.47	5.9	0.0234	0.947368	5	2	1
144	4	9.03	9.5	0.1031	1.14175	5	2	1
145	5	10.88	9.7	1.0261	9.43107	5	2	1
146	5	10.12	9.7	1.2238	12.0929	6	2	2
147	4	25.36	13.6	1.5518	6.11909	6	2	2
148	4	11.96	9.8	0.7404	6.19064	7	2	2
149	4	14.54	10.6	1.3577	9.33769	7	2	2
150	5	13.03	9.8	1.1335	8.69916	7	2	2
151	4	12.84	9.7	0.7978	6.2134	7	2	2
152	5	14.82	10.3	2.4316	16.4076	7	2	2
153	3	9.65	9.7	0.1748	1.8114	7	2	2
154	4	16.03	11.9	0.559	3.48721	8	2	2
155	4	6.93	8.8	0.7103	10.2496	8	2	2
156	2	6.33	7.6	0.0668	1.05529	8	2	2
157	4	17.38	10.5	0.9083	5.22612	8	2	2
158	5	24.88	13.6	1.1047	4.44011	8	2	2
159	4	15.98	10.2	0.5801	3.63016	9	2	2
160	4	14.16	10	0.8187	5.78178	9	2	2
161	4	11.08	9.5	0.2501	2.25722	9	2	2
162	4	6.95	8.5	0.1758	2.5295	9	2	2
163	4	8.52	8.5	0.0415	0.487089	9	2	2
164	4	6.34	7.5	0.0356	0.561514	9	2	2
165	4	5.06	6.9	0.1228	2.42688	9	2	2
166	3	4.54	6.6	0.087	1.9163	9	2	2
167	3	4.5	6.5	0.1249	2.77556	9	2	2
168	4	21.75	11.4	0.8087	3.71816	9	2	2
169	4	21.38	11.3	0.8879	4.15295	9	2	2
170	4	12.58	9.6	0.4217	3.35215	9	2	2
171	4	16.03	10.9	0.4841	3.01996	9	2	2
172	3	4.6	7.4	0.299	6.5	9	2	2
173	4	7.82	8.1	0.1516	1.93862	9	2	2
174	4	6.32	7.3	0.2067	3.27057	9	2	2
175	4	8.29	10.4	0.4748	5.72738	10	2	2
176	4	5.93	9	0.3565	6.0118	10	2	2
177	3	5.4	8.6	0.1302	2.41111	10	2	2
178	4	6.7	9	0.5481	8.1806	10	2	2
179	4	6.94	9.3	0.5455	7.86023	10	2	2
180	4	6.71	9.1	0.3455	5.14903	10	2	2
181	4	8.24	9.5	0.5159	6.26092	10	2	2
182	4	5.88	8.6	0.4144	7.04762	10	2	2
183	4	5.72	8.5	0.3718	6.5	11	2	2
184	4	8.24	9.6	0.4851	5.88714	11	2	2
185	4	7.74	9.3	0.4216	5.44703	11	2	2
186	4	7.52	9.3	0.4628	6.15426	11	2	2
187	4	5.64	8.8	0.2499	4.43085	11	2	2
188	4	7.38	9.2	0.4643	6.29133	11	2	2
189	4	6.83	9.2	0.4088	5.98536	11	2	2
190	4	7.13	8.5	0.5454	7.64937	11	2	2
191	4	5.04	7.4	0.3542	7.02778	11	2	2
192	4	5.13	8.5	0.3503	6.82846	11	2	2
193	3	5.01	7.4	0.2128	4.2475	11	2	2
194	2	16.12	11.2	0.0547	0.33933	12	2	2
195	4	12.65	10	0.2668	2.10909	12	2	2
196	4	11.93	10	0.8055	6.75189	12	2	2
197	3	5.76	8.2	0.1814	3.14931	12	2	2
198	2	8.56	9	0.0744	0.869159	12	2	2
199	3	5.86	8.2	0.0588	1.00341	12	2	2
200	4	14.38	11	0.3387	2.35535	12	2	2
201	1	5.58	8	0.0186	0.333333	12	2	2
202	1	4.9	7.2	0.017	0.346939	12	2	2
203	2	14.88	9.8	0.0559	0.375672	1	3	1
204	3	4.36	6.5	0.1775	4.0711	1	3	1
205	4	19.45	10.5	1.2166	6.25501	1	3	1
206	2	19.9	10.7	0.0558	0.280402	2	3	1
207	2	23.91	11.5	0.0584	0.244249	2	3	1
208	3	11.02	9.6	0.1068	0.969147	2	3	1
209	4	17.37	10.4	0.8902	5.12493	2	3	1
210	2	6	7.6	0.0667	1.11167	2	3	1
211	3	9.26	8.5	0.2001	2.16091	2	3	1
212	3	6.83	7.6	0.1068	1.56369	2	3	1
213	4	8.76	8.1	0.8611	9.82991	2	3	1
214	4	11.64	9.1	1.6007	13.7517	2	3	1
215	4	10.17	8.9	0.6106	6.00393	3	3	1
216	3	7.58	8	0.0972	1.28232	3	3	1
217	4	7.57	8.7	0.6648	8.78203	3	3	1
218	3	5.38	6.8	0.1069	1.98699	3	3	1
219	4	15.36	9.7	1.1722	7.63151	3	3	1
220	4	16	11.5	1.2322	7.70125	3	3	1
221	4	14.88	9.4	1.3009	8.74261	3	3	1
222	4	15.17	9.4	1.6173	10.6612	3	3	1
223	4	9.2	8.3	0.946	10.2826	3	3	1
224	4	8.14	8.8	0.916	11.2531	3	3	1
225	4	8.25	8.5	1.3223	16.0279	3	3	1
226	4	7.11	7.2	0.696	9.78903	3	3	1
227	4	19.8	10.6	0.5182	2.61717	3	3	1
228	2	8.82	8.2	0.0406	0.460317	3	3	1
229	4	15.71	10.5	2.2001	14.0045	3	3	1
230	2	17.37	10.6	0.039	0.224525	3	3	1
231	4	9.69	8.2	0.9092	9.38287	4	3	1
232	4	7.55	8.1	0.5408	7.16291	4	3	1
233	4	9.48	8.8	0.4458	4.70253	4	3	1
234	4	9.77	8.9	0.3712	3.79939	4	3	1
235	4	9.32	8.2	0.2345	2.51609	4	3	1
236	1	5.09	7.1	0.0218	0.428291	4	3	1
237	4	10.04	8.6	0.2992	2.98008	4	3	1
238	3	5.93	7.2	0.1423	2.39966	4	3	1
239	4	9.24	8.2	0.2223	2.40584	4	3	1
240	4	5.83	6.8	0.1493	2.56089	4	3	1
241	3	4.24	6.3	0.0719	1.69575	4	3	1
242	2	6.39	7.4	0.0754	1.17997	5	3	1
243	3	7.17	8.4	0.1659	2.31381	5	3	1
244	4	6.11	7	0.2992	4.89689	5	3	1
245	4	8.69	8.5	0.1561	1.79632	5	3	1
246	4	8.14	7.7	0.3245	3.98649	5	3	1
247	3	5.72	7.1	0.1172	2.04895	5	3	1
248	1	5.02	7.4	0.0207	0.412351	5	3	1
249	4	8.21	8	0.2219	2.7028	5	3	1
250	4	7.96	8.8	0.1733	2.17714	5	3	1
251	4	9.77	8.1	0.3467	3.54862	5	3	1
252	4	9.83	8.4	0.4553	4.63174	5	3	1
253	4	7.34	7.5	0.1546	2.10627	5	3	1
254	3	5.84	6.8	0.1044	1.78767	5	3	1
255	5	13.29	9.9	1.5478	11.6464	5	3	1
256	5	15.87	11	1.4792	9.32073	6	3	2
257	5	18.68	10.5	1.4578	7.80407	6	3	2
258	4	18.7	11.3	0.3666	1.96043	6	3	2
259	4	13.83	10.6	0.3368	2.43529	6	3	2
260	2	17.27	11.4	0.0106	0.0613781	6	3	2
261	4	10.86	10.1	0.4202	3.86924	6	3	2
262	4	15.67	11.2	0.3547	2.26356	6	3	2
263	1	6.38	7.8	0.0333	0.521944	7	3	2
264	5	17.04	10.6	1.6421	9.63674	7	3	2
265	4	11.48	9.9	0.2358	2.05401	7	3	2
266	4	18.81	11.2	1.8214	9.68315	7	3	2
267	2	5.09	7.2	0.0286	0.561886	7	3	2
268	4	14.26	10.6	0.4975	3.48878	8	3	2
269	5	6.17	7.4	1.6322	26.4538	8	3	2
270	4	16.63	12.6	0.5911	3.55442	8	3	2
271	5	7.19	8.6	1.7511	24.3547	9	3	2
272	4	16.03	11.9	0.559	3.48721	9	3	2
273	4	6.93	8.8	0.7103	10.2496	9	3	2
274	4	11.96	10	0.618	5.16722	10	3	2
275	4	11.94	10.1	1.2629	10.5771	10	3	2
276	4	11.48	9.9	0.4264	3.71429	10	3	2
277	3	8.38	9.7	0.187	2.2315	10	3	2
278	3	9.72	9.9	0.1803	1.85494	10	3	2
279	3	13.75	12.6	0.1528	1.11127	10	3	2
280	3	17.11	11.3	0.1586	0.926943	10	3	2
281	3	8.01	8.7	0.0989	1.23471	10	3	2
282	5	12.83	10.2	1.8315	14.2751	10	3	2
283	5	11.94	10.2	1.4939	12.5117	10	3	2
284	4	13.6	11.6	1.3565	9.97426	10	3	2
285	4	22.1	12.5	0.7037	3.18416	10	3	2
286	4	9.31	9.5	0.456	4.89796	10	3	2
287	4	10.39	9.7	0.8291	7.97979	10	3	2
288	3	7.2	8.8	0.0986	1.36944	10	3	2
289	4	15.12	11.2	0.5274	3.4881	11	3	2
290	4	6.54	8.3	0.6701	10.2462	11	3	2
291	4	15.4	11.6	0.5423	3.52143	11	3	2
292	4	6.66	8.5	0.6891	10.3468	12	3	2
293	4	15.12	11.2	0.5274	3.4881	12	3	2
294	4	6.54	8.3	0.6701	10.2462	12	3	2
295	4	10.13	8.2	1.156	11.4116	1	4	1
296	3	12.46	9.8	0.1516	1.21669	1	4	1
297	2	12.1	10.6	0.0496	0.409917	1	4	1
298	2	8.98	8.1	0.081	0.902004	1	4	1
299	4	11.36	9.5	0.493	4.33979	1	4	1
300	2	13.68	10.5	0.0654	0.47807	1	4	1
301	4	9.83	8.2	1.0979	11.1689	1	4	1
302	4	6.19	7.2	0.0611	0.987076	1	4	1
303	2	12.46	10.7	0.0632	0.507223	1	4	1
304	4	12.6	10.2	0.5126	4.06825	1	4	1
305	4	7.83	8.7	1.0422	13.3103	1	4	1
306	4	9.4	8	0.3292	3.50213	1	4	1
307	4	11.87	9	0.7541	6.35299	1	4	1
308	4	8.71	8.2	0.611	7.01493	1	4	1
309	2	23.41	12.6	0.0657	0.280649	2	4	1
310	4	18.07	11.4	1.379	7.63143	2	4	1
311	4	18.82	10.1	1.4496	7.70244	2	4	1
312	4	17.51	11	1.5305	8.74072	2	4	1
313	4	17.85	11	1.9027	10.6594	2	4	1
314	3	11.99	10	0.1562	1.30275	2	4	1
315	4	11.17	9.6	0.6876	6.15577	2	4	1
316	2	14.93	11	0.0974	0.652378	2	4	1
317	1	12.58	10.2	0.0089	0.0707472	2	4	1
318	3	9.49	9.6	0.1731	1.82403	2	4	1
319	2	16.2	10.7	0.0654	0.403704	2	4	1
320	2	17.5	11.5	0.0658	0.376	3	4	1
321	3	5.13	7.6	0.2088	4.07018	3	4	1
322	4	22.88	12.4	1.4313	6.25568	3	4	1
323	2	28.13	13.5	0.0687	0.244223	4	4	1
324	3	12.96	11.3	0.1256	0.969136	4	4	1
325	4	20.43	12.2	1.0473	5.12628	4	4	1
326	2	7.06	8.9	0.0785	1.1119	4	4	1
327	3	10.89	10	0.2354	2.16162	4	4	1
328	3	8.03	8.9	0.1256	1.56413	4	4	1
329	4	10.3	9.5	1.013	9.83495	4	4	1
330	4	13.69	10.7	1.8832	13.756	4	4	1
331	4	11.97	10.5	0.7183	6.00084	4	4	1
332	3	8.92	9.4	0.1144	1.28251	4	4	1
333	4	8.9	9.1	0.7821	8.78764	4	4	1
334	3	6.33	8	0.1258	1.98736	4	4	1
335	4	10.82	9.8	1.1129	10.2856	5	4	1
336	4	9.58	9	1.0777	11.2495	5	4	1
337	4	9.71	8.8	1.5556	16.0206	5	4	1
338	4	8.36	8.5	0.8188	9.79426	5	4	1
339	4	23.29	12.5	0.6097	2.61786	5	4	1
340	2	10.38	9.6	0.0478	0.460501	5	4	1
341	4	18.48	11.1	2.5883	14.006	5	4	1
342	2	20.44	12.5	0.0459	0.22456	5	4	1
343	4	11.4	9.6	1.0696	9.38246	5	4	1
344	4	8.88	9.2	0.6362	7.16441	5	4	1
345	3	16.14	10.8	0.151	0.935564	6	4	2
346	3	7.56	8.3	0.0942	1.24603	6	4	2
347	5	12.1	9.7	1.7443	14.4157	6	4	2
348	5	11.26	9.7	1.4228	12.6359	6	4	2
349	4	12.83	11	1.2919	10.0694	6	4	2
350	4	20.85	11.9	0.6702	3.21439	6	4	2
351	4	8.78	9	0.4343	4.94647	6	4	2
352	4	9.8	9.2	0.7896	8.05714	6	4	2
353	3	6.79	7.8	0.0939	1.38292	6	4	2
354	4	8.05	9.2	0.2982	3.70435	6	4	2
355	4	10.86	10.4	1.225	11.2799	7	4	2
356	4	12.19	10.6	1.11	9.10582	7	4	2
357	4	8.37	8.9	1.1693	13.9701	7	4	2
358	4	10.74	9.5	1.4538	13.5363	7	4	2
359	4	7.81	8.5	0.6213	7.95519	7	4	2
360	4	11.02	9.5	0.9698	8.80036	7	4	2
361	4	8.27	8.7	0.7959	9.62394	7	4	2
362	4	9.44	8.8	1.2823	13.5837	7	4	2
363	4	11.56	9.5	0.4929	4.26384	7	4	2
364	4	6.51	8	0.2383	3.66052	7	4	2
365	4	5.88	7.2	0.0996	1.69388	7	4	2
366	4	15.79	11	0.4216	2.67004	7	4	2
367	5	16.16	10.3	2.8159	17.4251	7	4	2
368	4	11.54	9.8	0.2862	2.48007	8	4	2
369	4	6.88	7.5	0.1779	2.58576	8	4	2
370	5	9.02	9.4	0.519	5.75388	8	4	2
371	5	8.23	8.5	0.1856	2.25516	8	4	2
372	4	8.89	9	0.1853	2.08436	8	4	2
373	4	9.35	9.4	0.54	5.7754	8	4	2
374	3	6.89	8	0.1032	1.49782	8	4	2
375	1	12.02	10.5	0.0159	0.13228	8	4	2
376	4	10.09	9.4	0.2695	2.67096	8	4	2
377	4	9.68	9	0.4734	4.8905	8	4	2
378	4	9.31	9.3	0.4762	5.11493	8	4	2
379	1	10.72	10.4	0.0401	0.374067	8	4	2
380	5	15.63	10.5	1.8209	11.65	9	4	2
381	5	25.2	11.6	1.9021	7.54802	9	4	2
382	5	22.82	11.5	1.9316	8.4645	9	4	2
383	4	10.83	9	0.8179	7.55217	9	4	2
384	4	11.87	9.4	1.1627	9.79528	9	4	2
385	5	19.11	10.7	1.7883	9.35793	9	4	2
386	5	14.86	10.5	2.8027	18.8607	9	4	2
387	4	16.17	10.9	0.7869	4.86642	9	4	2
388	3	6.2	7.5	0.1023	1.65	9	4	2
389	3	10.26	9.5	0.1199	1.16862	9	4	2
390	3	9.58	9.5	0.1812	1.89144	9	4	2
391	3	5.72	7.2	0.1525	2.66608	9	4	2
392	4	11.155	9.3	0.52442	4.70121	10	4	2
393	4	11.49	8.7	0.4367	3.8007	10	4	2
394	4	10.97	9.6	0.2759	2.51504	10	4	2
395	1	5.99	7.8	0.0257	0.429048	10	4	2
396	4	11.81	10.1	0.352	2.98052	10	4	2
397	3	6.98	8.5	0.1674	2.39828	10	4	2
398	4	10.87	9.6	0.2615	2.4057	10	4	2
399	4	6.86	8	0.1757	2.56122	10	4	2
400	3	4.99	7.4	0.0846	1.69539	10	4	2
401	2	7.52	8.7	0.0887	1.17952	10	4	2
402	3	8.43	8.7	0.19522	2.31578	11	4	2
403	4	7.19	8.2	0.352	4.89569	11	4	2
404	4	10.22	9.1	0.1836	1.79648	11	4	2
405	4	9.58	9	0.3818	3.98539	11	4	2
406	3	6.73	8.3	0.1379	2.04903	11	4	2
407	4	12.8	9.5	0.3223	2.51797	11	4	2
408	4	15.84	10.7	0.6772	4.27525	11	4	2
409	4	11.28	9.5	0.5886	5.21809	11	4	2
410	4	11.26	9.6	1.2028	10.6821	11	4	2
411	4	10.83	9.4	0.4061	3.74977	11	4	2
412	3	7.91	9.2	0.1781	2.25158	11	4	2
413	3	9.17	9.4	0.1717	1.87241	11	4	2
414	3	12.97	12	0.1455	1.12182	11	4	2
415	1	5.9	7.6	0.0243	0.411864	12	4	2
416	4	9.66	9.4	0.261	2.70186	12	4	2
417	4	9.36	9	0.2039	2.17842	12	4	2
418	4	11.49	9.5	0.4079	3.55004	12	4	2
419	4	11.57	9.9	0.5356	4.62921	12	4	2
420	4	8.64	8.8	0.1819	2.10532	12	4	2
421	3	6.87	8	0.1228	1.78748	12	4	2
422	3	25.78	12.8	0.155	0.601241	12	4	2
423	2	20.71	12	0.0793	0.382907	12	4	2
424	4	14.31	10.4	1.885	13.1726	12	4	2
425	3	15.16	11.5	0.1758	1.15963	12	4	2
426	3	18.36	11.8	0.1891	1.02996	12	4	2
427	4	17.97	11.6	0.2171	1.20812	12	4	2
428	3	15.79	11.2	0.1224	0.775174	12	4	2
429	4	8.95	8.8	1.2831	14.3363	12	4	2
430	3	13.78	10.7	1.465	10.6313	12	4	2
431	3	19.47	12.3	0.1388	0.712892	12	4	2
432	4	13.11	10.3	0.4614	3.51945	12	4	2
